# Supplementary material
Source: MDPI journal article supplement (https://www.mdpi.com/2071-1050/15/2/1164)
Supplement: s1 [file s1]

**Table S4.** Frequency distribution of respondents' responses on practice-related questions towards plastic pollution.

| Variables                                                                          | Frequency (N = 294) | Percentage (%) |
|------------------------------------------------------------------------------------|---------------------|----------------|
| Do you separate plastic waste from other household wastes?                         |                     |                |
| Yes                                                                                | 98                  | 33.3           |
| No                                                                                 | 91                  | 31.0           |
| Sometimes                                                                          | 105                 | 35.7           |
| Do you recycle your plastic waste at home?                                         |                     |                |
| Yes                                                                                | 151                 | 51.4           |
| No                                                                                 | 67                  | 22.8           |
| Sometimes                                                                          | 76                  | 25.9           |
| Do you use reusable bag(s) during groceries shopping?                              |                     |                |
| Yes                                                                                | 199                 | 67.7           |
| No                                                                                 | 13                  | 4.4            |
| Sometimes                                                                          | 82                  | 27.9           |
| Do you bring and use reusable container(s) to takeaway food or drinks?             |                     |                |
| Yes                                                                                | 139                 | 47.3           |
| No                                                                                 | 27                  | 9.2            |
| Sometimes                                                                          | 108                 | 36.7           |
| Do you frequently purchase plastic-made product(s) or plastic-packaged product(s)? |                     |                |
| Yes                                                                                | 122                 | 41.5           |
| No                                                                                 | 35                  | 11.9           |
| Sometimes                                                                          | 137                 | 46.6           |
| Do you participate in plastic pollution related awareness creation campaigns?      |                     |                |
| Yes                                                                                | 58                  | 19.7           |
| No                                                                                 | 153                 | 52.0           |
| Sometimes                                                                          | 83                  | 28.2           |
