# Supplementary material
Source: MDPI journal article supplement (https://www.mdpi.com/2071-1050/15/2/1164)
Supplement: s1 [file s1]

**Table S3.** Frequency distribution of respondents' responses on attitude-related questions towards plastic pollution.

| Variables                                                                                                                          | Frequency (N = 294) | Percentage (%) |
|------------------------------------------------------------------------------------------------------------------------------------|---------------------|----------------|
| Do you think that plastic pollution is the topmost environmental problems of our time?                                             |                     |                |
| Yes                                                                                                                                | 248                 | 84.4           |
| No                                                                                                                                 | 13                  | 4.4            |
| Maybe                                                                                                                              | 33                  | 11.2           |
| Do you think the plastic pollution situation in Malaysia is severe?                                                                |                     |                |
| Yes                                                                                                                                | 254                 | 86.4           |
| No                                                                                                                                 | 10                  | 3.4            |
| Maybe                                                                                                                              | 30                  | 10.2           |
| Do you think Malaysian government has put sufficient effort in reducing plastic pollution?                                         |                     |                |
| Yes                                                                                                                                | 41                  | 13.9           |
| No                                                                                                                                 | 215                 | 73.1           |
| Maybe                                                                                                                              | 38                  | 12.9           |
| Do you think the public has the responsibility in reducing plastic pollution in Malaysia?                                          |                     |                |
| Yes                                                                                                                                | 267                 | 90.8           |
| No                                                                                                                                 | 16                  | 5.4            |
| Maybe                                                                                                                              | 11                  | 3.7            |
| Do you think an increase in public's awareness can help to reduce plastic pollution?                                               |                     |                |
| Yes                                                                                                                                | 254                 | 86.4           |
| No                                                                                                                                 | 13                  | 4.4            |
| Maybe                                                                                                                              | 27                  | 9.2            |
| Do you think littering or mismanagement of plastic wastes is one of the causes of plastic pollution?                               |                     |                |
| Yes                                                                                                                                | 273                 | 92.9           |
| No                                                                                                                                 | 9                   | 3.1            |
| Maybe                                                                                                                              | 12                  | 4.1            |
| Do you think that the taxation on single-use plastics in Malaysia could be an appropriate action toward reduction of plastic uses? |                     |                |
| Yes                                                                                                                                | 180                 | 61.2           |
| No                                                                                                                                 | 33                  | 11.2           |
| Maybe                                                                                                                              | 81                  | 27.6           |
| Do you think that single-use plastics should be banned completely in Malaysia?                                                     |                     |                |
| Yes                                                                                                                                | 150                 | 51.0           |
| No                                                                                                                                 | 43                  | 14.6           |
| I do not know                                                                                                                      | 101                 | 34.4           |
| Do you think plastic that ends up in landfills or the ocean can harm human health and the environment?                             |                     |                |
| Yes                                                                                                                                | 272                 | 92.5           |
| No                                                                                                                                 | 14                  | 4.8            |
| Maybe                                                                                                                              | 18                  | 6.1            |

Do you think that you can stop using single-use plastics in your daily life? (e.g., plastic bag, straw, plastic utensil, plastic cotton bud, etc.)

|       |     |      |
|-------|-----|------|
| Yes   | 152 | 51.7 |
| No    | 46  | 15.6 |
| Maybe | 96  | 32.7 |
