# Supplementary material
Source: MDPI journal article supplement (https://www.mdpi.com/2071-1050/15/2/1164)
Supplement: s1 [file s1]

**Table S2.** Frequency distribution of respondents' responses on knowledge-related questions towards plastic pollution.

| Variables                                                                                                                                                    | Frequency (N = 294) | Percentage (%) |
|--------------------------------------------------------------------------------------------------------------------------------------------------------------|---------------------|----------------|
| Most plastics are made from fossil fuels (example: natural gas, petroleum, coal, etc.).                                                                      |                     |                |
| Yes                                                                                                                                                          | 183                 | 62.2           |
| No                                                                                                                                                           | 38                  | 12.9           |
| Maybe                                                                                                                                                        | 73                  | 24.8           |
| Plastic affects human health and the environment at every stage of its lifecycle.                                                                            |                     |                |
| Yes                                                                                                                                                          | 277                 | 94.2           |
| No                                                                                                                                                           | 5                   | 1.7            |
| Maybe                                                                                                                                                        | 11                  | 3.7            |
| Incineration/ Burning of plastic wastes can release toxic metals, organic substances, acidic gases, and other toxic substances to the air, water, and soils. |                     |                |
| Yes                                                                                                                                                          | 281                 | 95.6           |
| No                                                                                                                                                           | 2                   | 0.7            |
| Maybe                                                                                                                                                        | 11                  | 3.7            |
| Discarded plastic, if digested, will not cause any harmful effect on organisms.                                                                              |                     |                |
| Yes                                                                                                                                                          | 97                  | 33.0           |
| No                                                                                                                                                           | 155                 | 52.7           |
| Maybe                                                                                                                                                        | 42                  | 14.3           |
| Some cosmetic products contain plastic in them.                                                                                                              |                     |                |
| Yes                                                                                                                                                          | 221                 | 75.2           |
| No                                                                                                                                                           | 3                   | 1.0            |
| Maybe                                                                                                                                                        | 70                  | 23.8           |
| Plastic will not degrade into plastic fragments.                                                                                                             |                     |                |
| Yes                                                                                                                                                          | 125                 | 42.5           |
| No                                                                                                                                                           | 103                 | 35.0           |
| Maybe                                                                                                                                                        | 66                  | 22.4           |
| A plastic bag will take about 10 years to degrade.                                                                                                           |                     |                |
| Yes                                                                                                                                                          | 168                 | 57.1           |
| No                                                                                                                                                           | 59                  | 20.1           |
| Maybe                                                                                                                                                        | 37                  | 12.6           |
| Degraded plastic fragments (e.g., microplastics, nano-plastics) can accumulate in the food chain and be consumed by humans.                                  |                     |                |
| Yes                                                                                                                                                          | 208                 | 70.7           |
| No                                                                                                                                                           | 24                  | 8.2            |
| Maybe                                                                                                                                                        | 62                  | 21.1           |
| Microplastics can be inhaled through air.                                                                                                                    |                     |                |
| Yes                                                                                                                                                          | 137                 | 46.6           |
| No                                                                                                                                                           | 25                  | 8.5            |
| Maybe                                                                                                                                                        | 132                 | 44.9           |
| Among municipal solid wastes produced in Malaysia, plastic wastes are the second highest in composition.                                                     |                     |                |
| Yes                                                                                                                                                          | 169                 | 57.5           |
| No                                                                                                                                                           | 14                  | 4.8            |
| Maybe                                                                                                                                                        | 111                 | 37.8           |
| Malaysia is one of the top ten countries with mismanaged plastic waste in the world.                                                                         |                     |                |
| Yes                                                                                                                                                          | 201                 | 68.4           |
| No                                                                                                                                                           | 6                   | 2.0            |
| Maybe                                                                                                                                                        | 87                  | 29.6           |
