# Supplementary material
Source: MDPI journal article supplement (https://www.mdpi.com/2071-1050/15/2/1164)
Supplement: s1 [file s1]

**Table S1.** Social-demographic information, knowledge, attitude and practice related questions towards plastic pollution.

| <b>A. Social-demographic</b>                                                            |                                                                                                                                                                |                                          |
|-----------------------------------------------------------------------------------------|----------------------------------------------------------------------------------------------------------------------------------------------------------------|------------------------------------------|
| <b>Questions</b>                                                                        | <b>Responses</b>                                                                                                                                               | <b>References</b>                        |
| What is your age range? (According to your last birthday)                               | 18-30<br>31-45<br>46-60<br>Above 60                                                                                                                            |                                          |
| What is your gender?                                                                    | Male<br>Female                                                                                                                                                 |                                          |
| What is your highest education level?                                                   | Up to Secondary schooling<br>Pre-university (college, diploma)<br>University (Environment- related subjects)<br>University (Non- Environment related subjects) |                                          |
| What is your present occupation?                                                        | Jobs in Government sectors<br>Jobs in private sectors<br>Professional (physicians, lawyers, etc.)<br>Business<br>Homemaker<br>Retired<br>Student<br>Unemployed |                                          |
| What is your nationality?                                                               | Malaysian<br>Non-Malaysian                                                                                                                                     |                                          |
| <b>B. Knowledge</b>                                                                     |                                                                                                                                                                |                                          |
| Please provide your opinion on following statements:                                    |                                                                                                                                                                |                                          |
| Most plastics are made from fossil fuels (example: natural gas, petroleum, coal, etc.). | Yes*<br>No<br>Maybe                                                                                                                                            | (Azoulay et al. 2019)                    |
| Plastic affects human health and the environment at every stage of its lifecycle.       | Yes*<br>No<br>Maybe                                                                                                                                            | (Afroz et al. 2017; Azoulay et al. 2019) |

|                                                                                                                                                              |                     |                        |
|--------------------------------------------------------------------------------------------------------------------------------------------------------------|---------------------|------------------------|
| Incineration/ Burning of plastic wastes can release toxic metals, organic substances, acidic gases, and other toxic substances to the air, water, and soils. | Yes*<br>No<br>Maybe | (Azoulay et al. 2019)  |
| Discarded plastic, if digested, will not cause any harmful effect on organisms.                                                                              | Yes<br>No*<br>Maybe | (Soares et al. 2021b)  |
| Some cosmetic products contain plastic in it.                                                                                                                | Yes*<br>No<br>Maybe | (Soares et al. 2021b)  |
| Plastic will not degrade into plastic fragments.                                                                                                             | Yes<br>No*<br>Maybe | (Soares et al. 2021b)  |
| A plastic bag will take 10 years to degrade.                                                                                                                 | Yes<br>No*<br>Maybe | (Chen et al. 2021)     |
| Degraded plastic fragments (e.g., microplastics, nano-plastics) can accumulate in the food chain and consume by humans.                                      | Yes*<br>No<br>Maybe | (Soares et al. 2021b)  |
| Microplastics can be inhaled through air.                                                                                                                    | Yes*<br>No<br>Maybe | (Azoulay et al. 2019)  |
| Among municipal solid wastes produced in Malaysia, plastic wastes are the second highest in composition.                                                     | Yes*<br>No<br>Maybe | (Chen et al. 2021)     |
| Malaysia is one of the top ten countries with mismanaged plastic waste in the world.                                                                         | Yes*<br>No<br>Maybe | (Chen et al. 2021)     |
| <b>C. Attitude</b>                                                                                                                                           |                     |                        |
| Do you think that plastic pollution is one of the biggest environmental problems of our time?                                                                | Yes*<br>Maybe<br>No | (Charitou et al. 2021) |
| Do you think the plastic pollution situation in Malaysia is severe?                                                                                          | Yes*<br>Maybe<br>No |                        |
| Do you think Malaysian government has sufficient effort in reducing plastic pollution?                                                                       | Yes<br>Maybe<br>No* |                        |
| Do you think the public has the responsibility in reducing plastic pollution in Malaysia?                                                                    | Yes*<br>Maybe<br>No |                        |
| Do you think an increase in public's awareness can help to reduce plastic pollution?                                                                         | Yes*<br>Maybe<br>No |                        |

|                                                                                                      |                     |  |
|------------------------------------------------------------------------------------------------------|---------------------|--|
| Do you think littering or mismanagement of plastic wastes is one of the causes of plastic pollution? | Yes*<br>Maybe<br>No |  |
|------------------------------------------------------------------------------------------------------|---------------------|--|

|                                                                                                                                    |                         |  |
|------------------------------------------------------------------------------------------------------------------------------------|-------------------------|--|
| Do you think that the taxation of single-use plastics in Malaysia could be an appropriate action toward reduction of plastic uses? | Yes*<br>Maybe<br>No     |  |
| Do you think that single-use plastics should be banned completely in Malaysia?                                                     | Yes*<br>Maybe<br>No     |  |
| Do you think plastic that ends up in landfills or the ocean can harm human health and the environment?                             | Yes*<br>Maybe<br>No     |  |
| Do you think you can stop using the single-use plastics in your daily life?                                                        | Yes*<br>Maybe<br>No     |  |
| Are you willing to use eco-friendly bags instead of plastic bags?                                                                  | Yes*<br>No<br>Maybe     |  |
| <b>D. Practices</b>                                                                                                                |                         |  |
| Do you separate plastic waste from other household wastes?                                                                         | Yes*<br>Sometimes<br>No |  |
| Do you recycle your plastic waste at home?                                                                                         | Yes*<br>Sometimes<br>No |  |
| Do you use reusable bag(s) during groceries shopping?                                                                              | Yes*<br>Sometimes<br>No |  |
| Do you bring and use reusable container(s) to takeaway food or drinks?                                                             | Yes*<br>Sometimes<br>No |  |
| Do you frequently purchase plastic-made product(s) or plastic-packaged product(s)?                                                 | Yes<br>Sometimes<br>No* |  |
| Do you participate in plastic pollution related awareness creation campaigns?                                                      | Yes*<br>Sometimes<br>No |  |

Note: \* indicates correct answer
