# Supplementary material
Source: MDPI journal article supplement (https://www.mdpi.com/2071-1050/15/2/1164)
Supplement: s1 [file s1]

Archive with 4 entries (4 files):
- Supplementary Table S1.pdf
- Supplementary Table S2.pdf
- Supplementary Table S3.pdf
- Supplementary Table S4.pdf
